# Supplementary material for: Improved photovoltaic performance of mesoporous perovskite solar cells with hydrogenated TiO2: prolonged photoelectron lifetime and high separation efficiency of photoinduced charge
Source: Royal Society of Chemistry journal article supplement (doi:10.1039/c6ra12205a), 2016-01-01
Supplement: c6ra12205a1.pdf [file c6ra12205a1.pdf]

# **Improved Photovoltaic Performance of Mesoporous Perovskite Solar Cells with Hydrogenated TiO<sub>2</sub>: Prolonged Photo-electrons Lifetime and High Separation Efficiency of Photoinduced Charge**

**Ting Su, Yulin Yang,\* Guohua Dong, Tengling Ye, Yanxia Jiang and Ruiqing Fan\***

*MIT Key Laboratory of Critical Materials Technology for New Energy Conversion and Storage, School of Chemistry and Chemical Engineering, Harbin Institute of Technology, Harbin 150001, P.R. China*

Prof. Yulin Yang and Ruiqing Fan

Department of Chemical Engineering and Technology

Harbin Institute of Technology, Harbin 150001, P. R. China

Fax: +86-451-86418270

E-mail: [ylyang@hit.edu.cn](mailto:ylyang@hit.edu.cn) and [fanruiqing@hit.edu.cn](mailto:fanruiqing@hit.edu.cn)

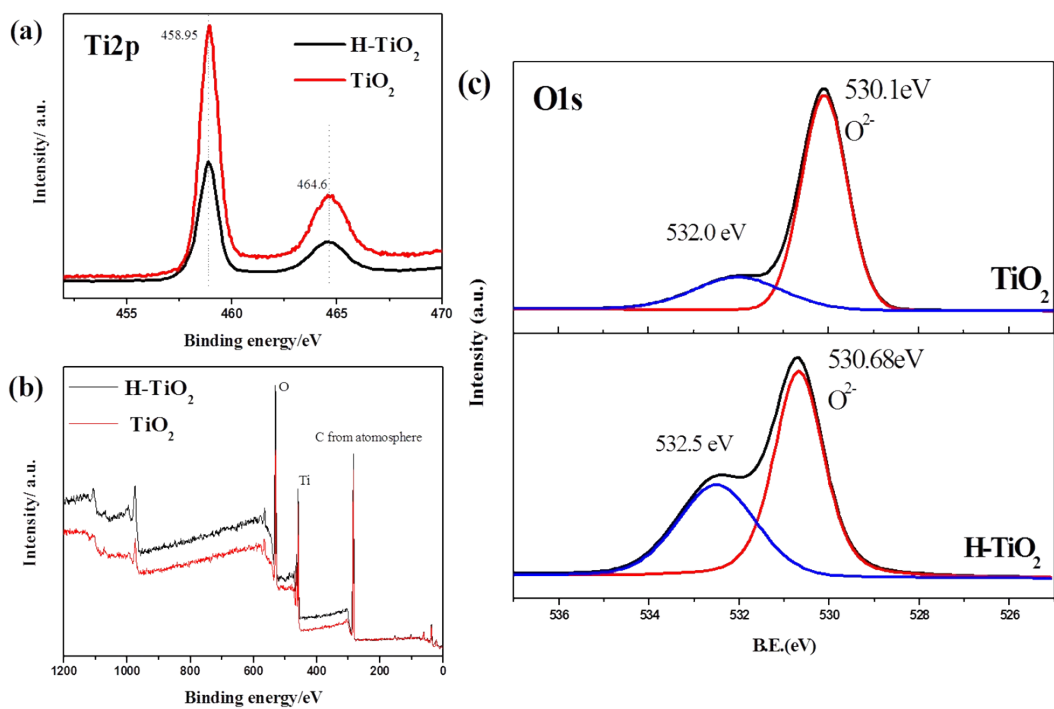

**Figure S1.** (a) Ti 2p, (b) Survey, (c) and (d) O 1s core-level XPS spectra of the TiO<sub>2</sub> and the H-TiO<sub>2</sub> nanopowders, collected under the same conditions.

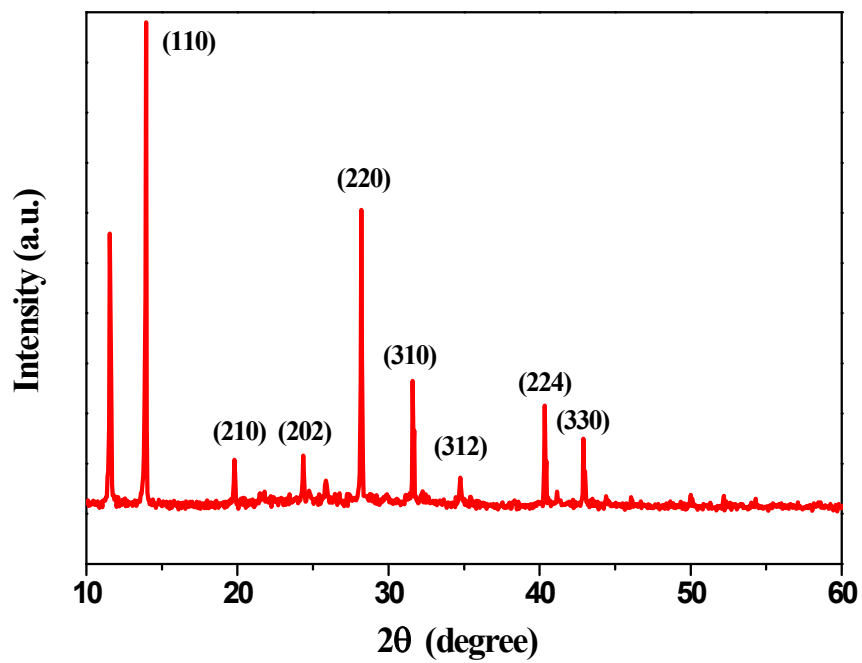

**Figure S2.** XRD patterns of the TiO<sub>2</sub>/perovskite layer.

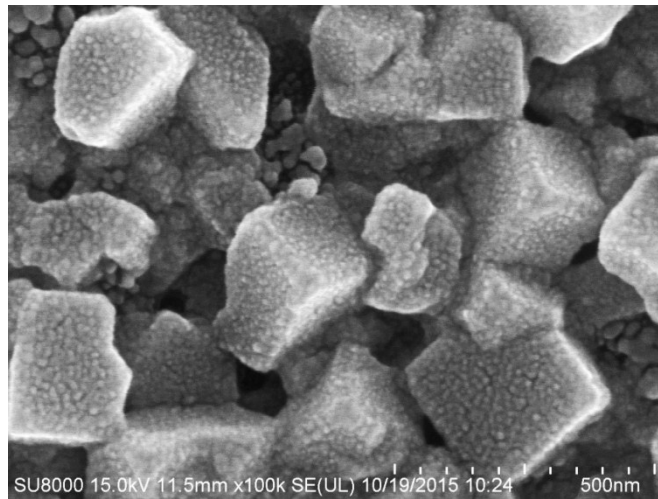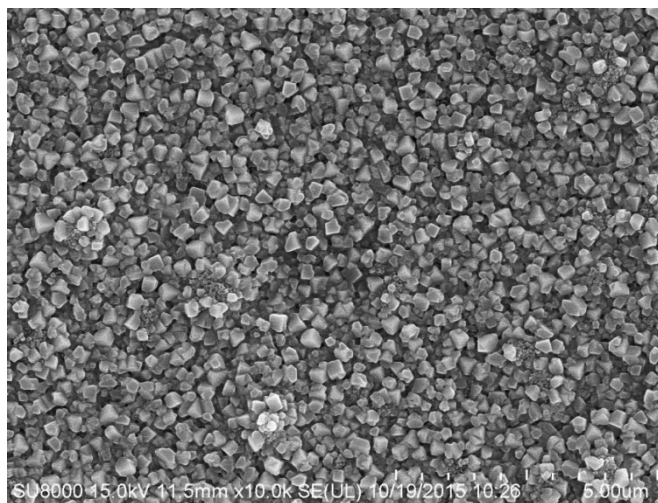

**Figure S3.** Higher-magnification SEM image of the PbI<sub>2</sub> layer.

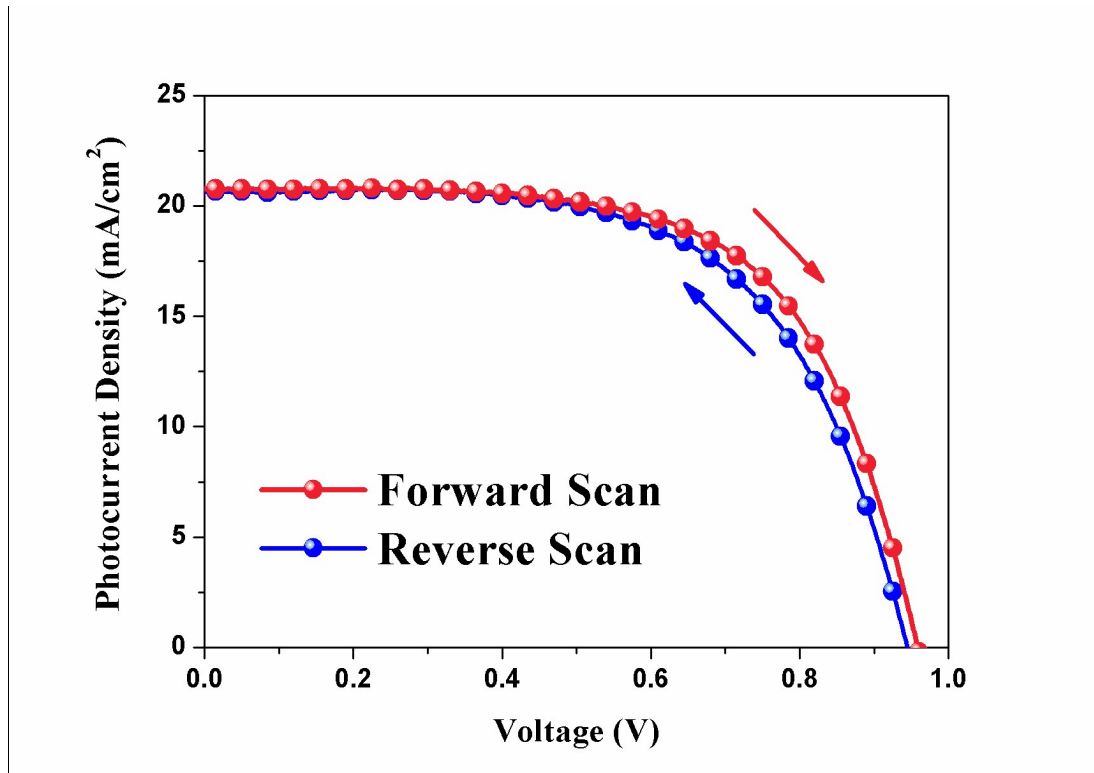

**Figure S4.** Hysteresis investigation of the PSCs based on H-TiO<sub>2</sub>

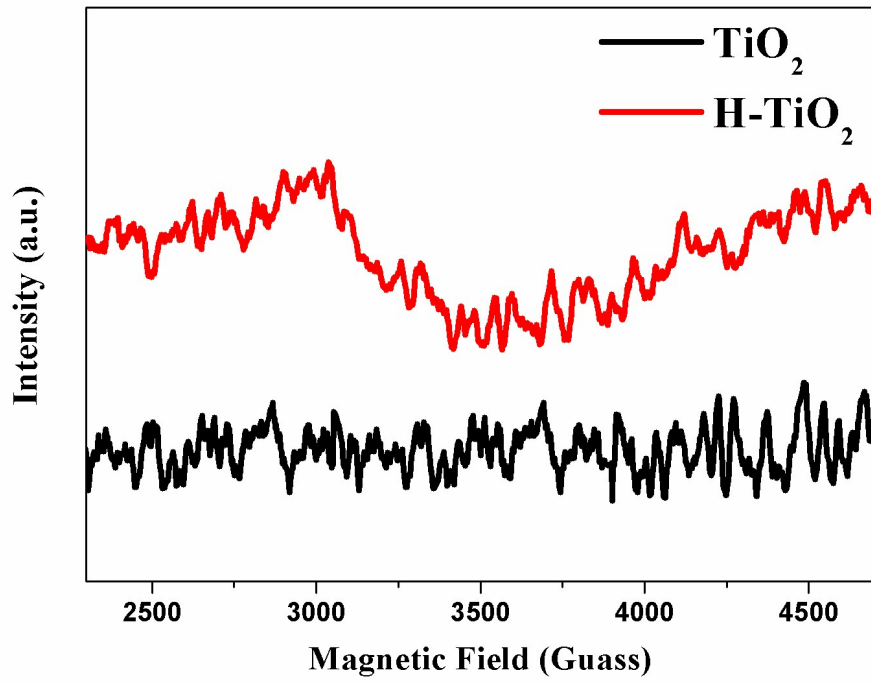

Fig. S5 EPR spectra recorded at 300 K for  $\text{TiO}_2$ ,  $\text{H-TiO}_2$  samples
